# Supplementary material for: One-dimensional β-Ni(OH)2 nanostructures: Ionic liquid etching synthesis, formation mechanism, and application for electrochemical capacitors
Source: Royal Society of Chemistry journal article supplement (doi:10.1039/c1ce05936j), 2011-01-01
Supplement: c1ce05936j.pdf [file c1ce05936j.pdf]

**Supporting Information for**

**One-dimensional  $\beta$ -Ni(OH)<sub>2</sub> nanostructure:**

**Ionic liquid etching synthesis, formation mechanism, and**

**application for electrochemical capacitor**

Zhijun Luo<sup>b, d</sup>, Kun Wang<sup>a</sup>, Huaming Li<sup>a,\*</sup>, Sheng Yin<sup>a</sup>, Qingfeng Guan<sup>c</sup>, Leigang Wang<sup>c</sup>

<sup>a</sup> *School of Chemistry and Chemical Engineering, Jiangsu University, Zhenjiang, 212013, P. R. China;*

<sup>b</sup> *School of The Environment, Jiangsu University, Zhenjiang, 212013, P. R. China;*

<sup>c</sup> *School of Materials Science and Engineering, Jiangsu University, Zhenjiang, 212013, P. R. China;*

<sup>d</sup> *State Key Laboratory of Coordination Chemistry, Nanjing University, Nanjing 210093, P. R. China*

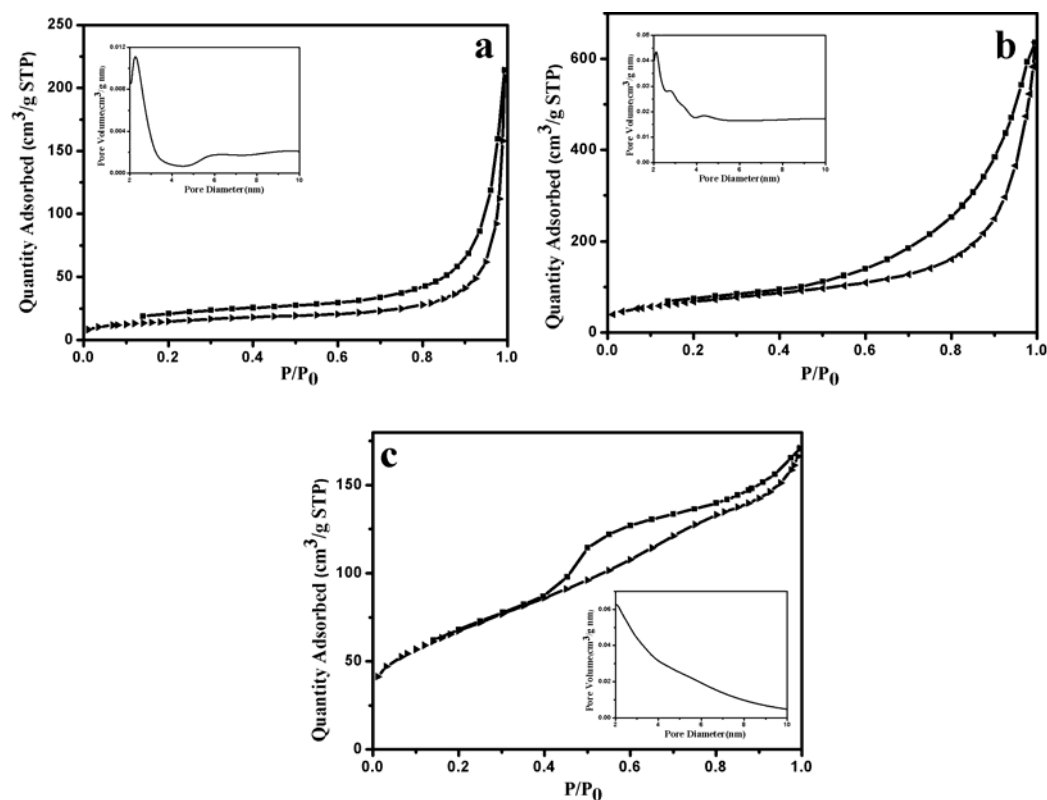

Figure S1. Nitrogen adsorption/desorption isotherms and pore size distribution (inset) of  $\beta$ -Ni(OH)<sub>2</sub> microspheres composed of nanosheets (a),  $\beta$ -Ni(OH)<sub>2</sub> microspheres composed of nanowires (b), bundles of  $\beta$ -Ni(OH)<sub>2</sub> nanowires (c), respectively.

Table S1. Structural parameters of  $\beta$ -Ni(OH)<sub>2</sub> with different nanostructures derived from nitrogen adsorption data

| Samples                                                          | $S_{\text{BET}}$ (m <sup>2</sup> /g) | Pore volume (cm <sup>3</sup> /g) | Pore size (nm) |
|------------------------------------------------------------------|--------------------------------------|----------------------------------|----------------|
| $\beta$ -Ni(OH) <sub>2</sub> microspheres composed of nanosheets | 53                                   | 0.142                            | 10.8           |
| $\beta$ -Ni(OH) <sub>2</sub> microspheres composed of nanowires  | 249                                  | 0.734                            | 11.8           |
| Bundles of $\beta$ -Ni(OH) <sub>2</sub> nanowires                | 243                                  | 0.245                            | 4.1            |
